# Supplementary material
Source: PubMed Central journal article supplement (PMC489994)

ApoE-/-  
MyD88+/+

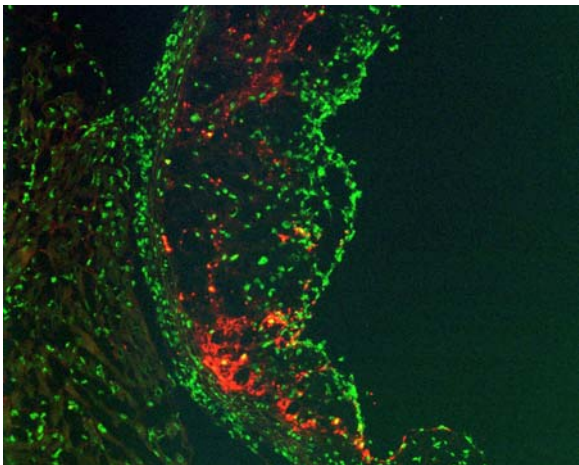

ApoE-/-  
MyD88+/-

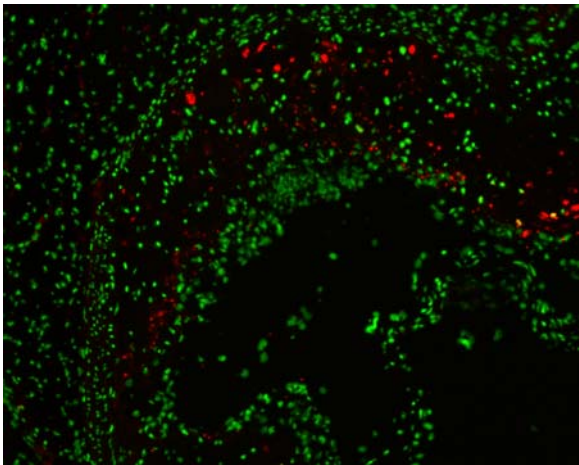

ApoE-/-  
MyD88-/-

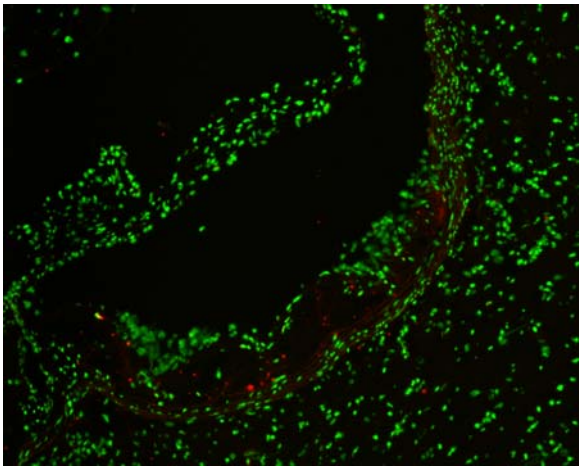

Supplement: pnas_101_29_10679__2.pdf [file pnas_101_29_10679__2.pdf]
